# Supplementary material for: Endophilin A2-mediated alleviation of endoplasmic reticulum stress-induced cardiac injury involves the suppression of ERO1α/IP3R signaling pathway
Source: PubMed Central journal article supplement (PMC8416715; doi:10.7150/ijbs.60110), 2021-08-26
Supplement: ijbsv17p3672s1.pdf [file ijbsv17p3672s1.pdf]

## Supplementary Table

| Gene          | Forward sequence     | Reverse sequence     |
|---------------|----------------------|----------------------|
| NPPA          | GGGCTTCTTCCTCTTCCTG  | CGCTTCATCGGTCTGCTC   |
| NPPB          | GAACAATCCACGATGCAGAA | CCTTGGTCCTTTGAGAGCTG |
| $\beta$ -MHC  | GAGACGGACGCCATACAG   | CCACATCCACCATCAGGT   |
| ERO1 $\alpha$ | CTGCGTCGGCTGCTTCAA   | TAACTGGGTCCGCTTTCC   |
| GAPDH         | GCAAGTTCAACGGCACAG   | GCCAGTAGACTCCACGACAT |

**Table S1. Rat-specific primer sequences for qPCR.**

|             | sham<br>(n=8) | MI+Ad-lacZ<br>(n=8) | MI+Ad-EndoA2<br>(n=8) |
|-------------|---------------|---------------------|-----------------------|
| LVAW;s (mm) | 1.39±0.04     | 0.77±0.16**         | 1.46±0.1##            |
| LVAW;d (mm) | 0.77±0.06     | 0.53±0.07**         | 0.71±0.09             |
| LVPW;s (mm) | 1.41±0.08     | 1.14±0.12           | 1.23±0.12             |
| LVPW;d (mm) | 0.85±0.07     | 0.73±0.08           | 0.82±0.08             |
| CO (%)      | 27.24±2.08    | 13.25±3.62**        | 27.86±2.51##          |
| LVID;s (mm) | 1.65±0.13     | 4.20±0.18**         | 3.06±0.19##           |
| LVID;d (mm) | 3.19±0.16     | 5.47±0.10**         | 4.30±0.11##           |
| EF (%)      | 80.83±2.12    | 38.10±4.45**        | 63.16±2.69##          |
| FS (%)      | 48.68±2.14    | 18.86±2.45**        | 34.37±1.93##          |

**Table S2. Echocardiography analyses of cardiac function after intramyocardial injection of Ad-EndoA2 or Ad-lacZ post-MI.** LVAW;s: left ventricular anterior wall at end systolic; LVAW;d: left ventricular anterior wall at end diastolic; LVPW;s: left ventricular posterior wall at end systolic; LVPW;d: left ventricular posterior wall at end diastolic; CO: cardiac output; LVID;s: left ventricular internal diameter at end systolic; LVID;d: left ventricular internal diameter at end diastolic; EF: ejection fraction; FS: fractional shortening (n=8 mice, \*\* $p$ <0.01 vs. sham group, ## $p$ <0.01 vs. MI+Ad-lacZ group).

# Supplementary Figure

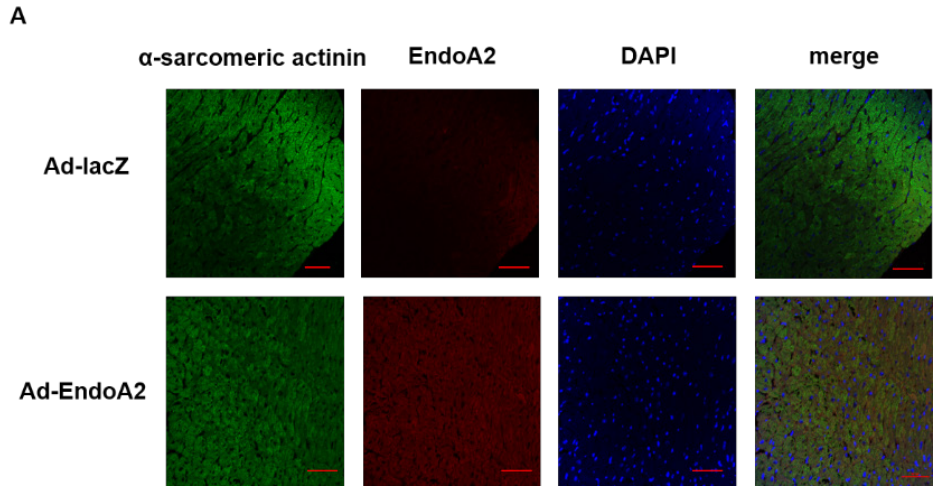

**Figure S1. The gene overexpression effects of Ad-EndoA2 after intramyocardial injection (n=3).**

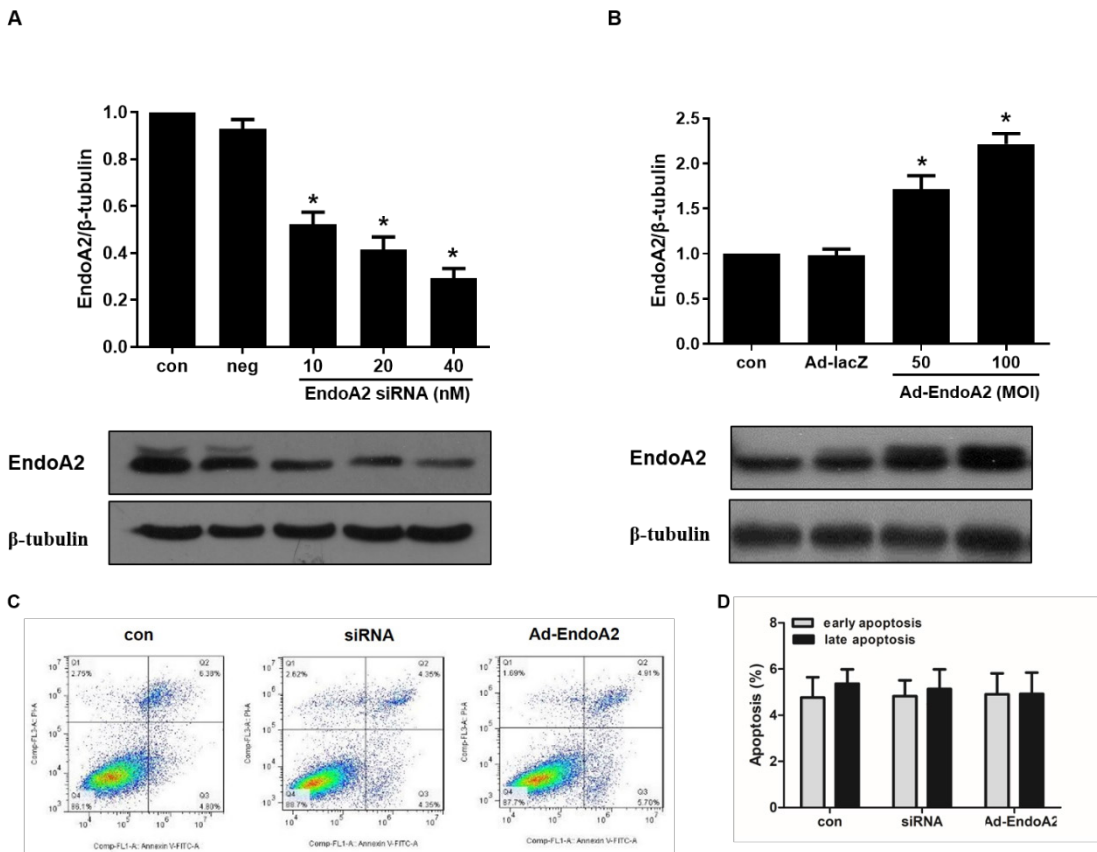

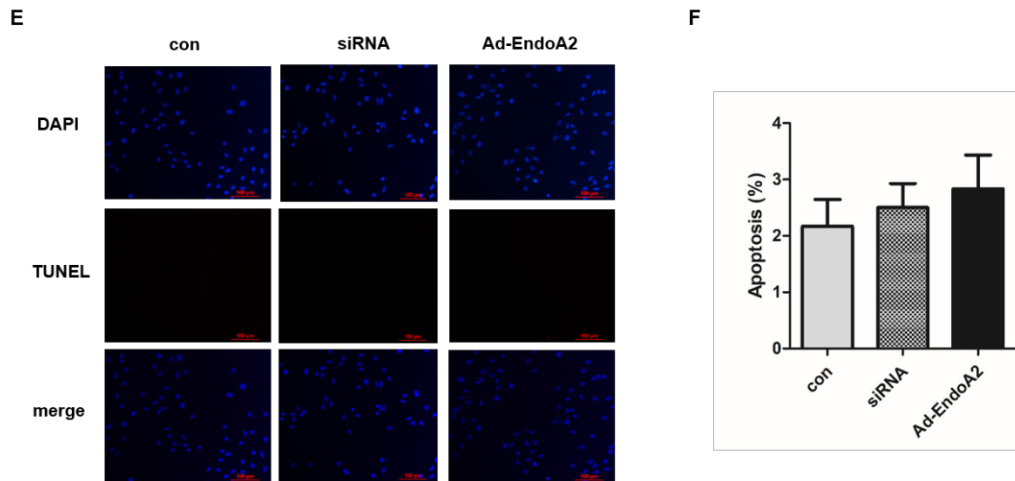

**Figure S2. Knockdown or overexpression of EndoA2 had no effect on cell apoptosis.** (A) Knockdown efficacy of EndoA2 siRNA in NRCMs. According to our previous studies, we chose to transfect with 20 nM EndoA2-siRNA for 48 h in the following experiment (n=4,  $p < 0.05$  vs con). (B) Overexpression efficacy of Ad-EndoA2 in NRCMs. According to our previous studies, we chose to transfect with 50 MOI Ad-EndoA2 for 48 h in the following experiment (n=4,  $p < 0.05$  vs con). (C-D) Annexin V-FITC/PI flow cytometry analyses showed that knockdown or overexpression of EndoA2 had no effect on cell apoptosis (n=6). (E-F) TUNEL and DAPI double-staining showed that knockdown or overexpression of EndoA2 had no effect on cell apoptosis (n=6).

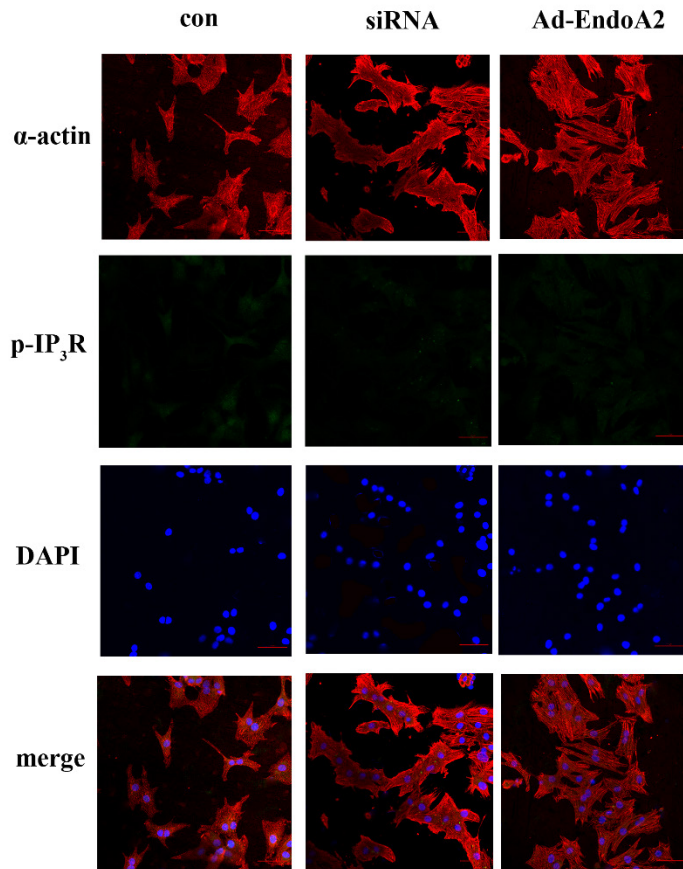

**Figure S3.** Representative images showed that knockdown or overexpression of EndoA2 had no effect on the phosphorylation of IP<sub>3</sub>R. Scale bars=50 μm (n=6).

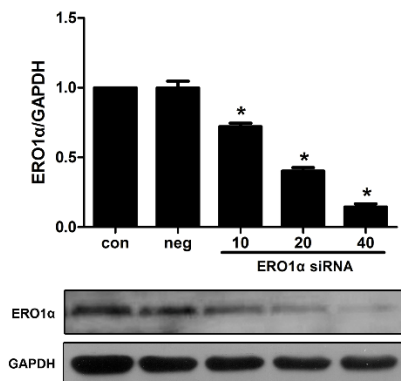

**Figure S4.** Representative images and densitometric analyses showed that 10-40 nM ERO1α siRNA decreased endogenous ERO1α expression (n=5, \**p*<0.05 vs. control).

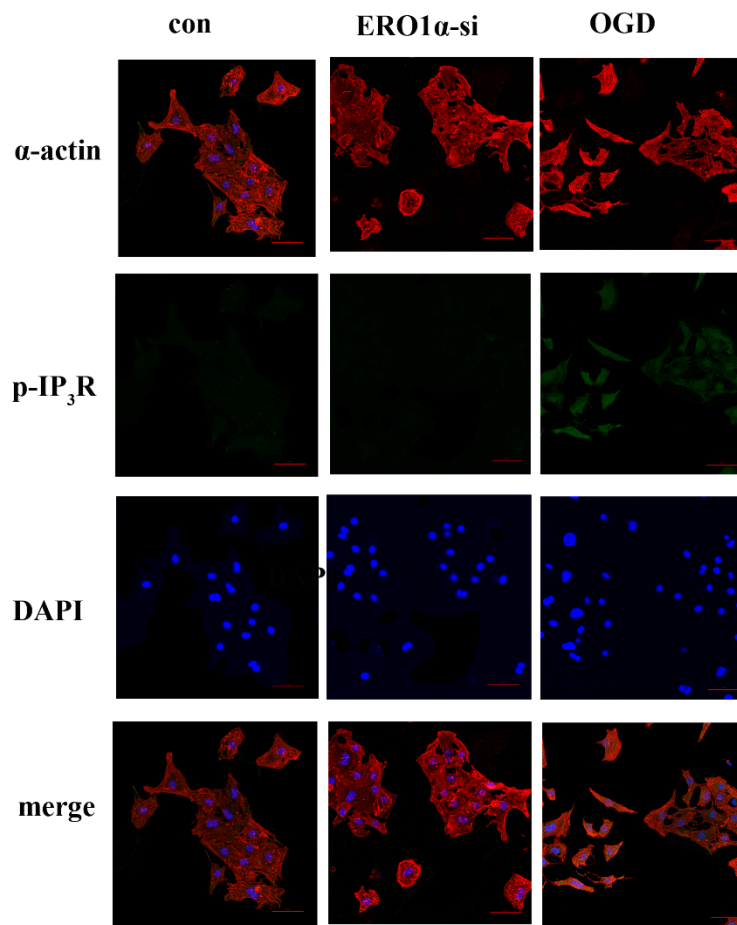

**Figure S5.** Representative images showed that knockdown of ERO1 $\alpha$  had no effect on the phosphorylation level of IP<sub>3</sub>R. Scale bars=50  $\mu$ m (n=6).
